# Supplementary material for: A SERS-based 3D nanobiosensor: towards cell metabolite monitoring
Source: Royal Society of Chemistry journal article supplement (doi:10.1039/d0ma00121j), 2020-01-01
Supplement: d0ma00121j1.pdf [file d0ma00121j1.pdf]

## Electronic Supplementary information

# A SERS-based 3D nanobiosensor for lactate detection: a first step towards multiplex cell metabolite monitoring

*Sara Abalde-Cela<sup>‡¶</sup>, Rita Rebelo<sup>‡i</sup>, Lei Wu<sup>‡¶</sup>, Ana I. Barbosa<sup>i</sup>, Laura Rodríguez-Lorenzo<sup>¶</sup>,  
Krishna Kant<sup>¶</sup>, Rui L. Reis<sup>i</sup>, Vitor M. Correlo<sup>i</sup>, Lorena Diéguez<sup>¶</sup>*

<sup>¶</sup> Department of Life Sciences, International Iberian Nanotechnology Laboratory (INL), Avda  
Mestre José Veiga s/n, 4715-310, Braga, Portugal.

<sup>‡</sup> 3B's Research Group, I3Bs - Research Institute on Biomaterials, Biodegradables and  
Biomimetics of University of Minho, Headquarters of the European Institute of Excellence on  
Tissue Engineering and Regenerative Medicine, AvePark–Parque de Ciência e Tecnologia, Zona  
Industrial da Gandra, 4805-017 Barco, Guimarães, Portugal.

<sup>i</sup> ICVS/3B's–PT Government Associated Laboratory, Braga, Guimarães, Portugal.

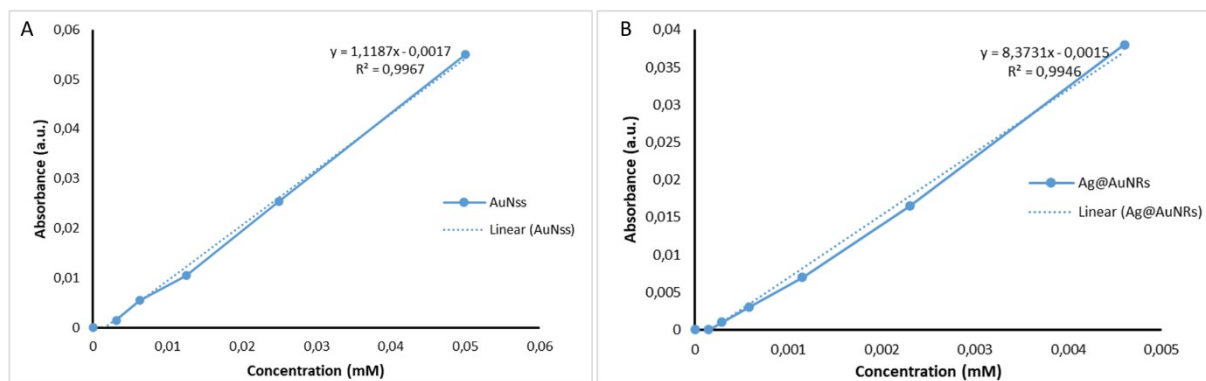

Figure S1- Calibration curves for (A) AuNss and (B) Au@AgNRs.

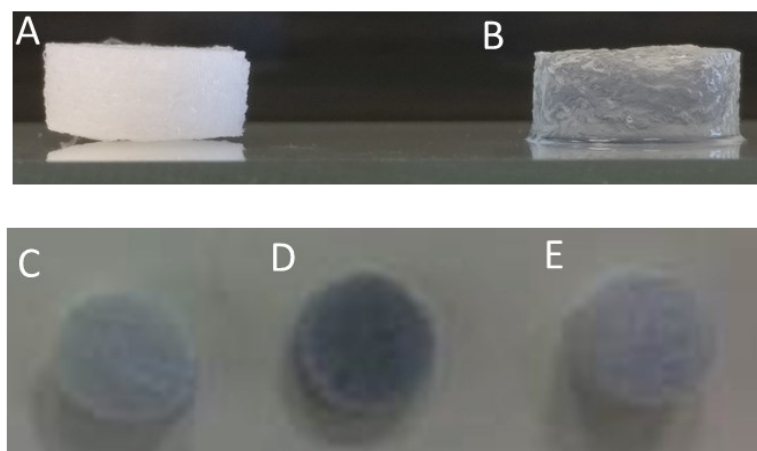

Figure S2- Optical images of (A) dry GG-SLH; (B) hydrated GG-SLH; (C) GG-SLH-AuNSTs at a concentration of 500  $\mu\text{M}$ ; (D) GG-SLH-AuNSTs at a concentration of 900  $\mu\text{M}$  and (E) GG-SLH-Au@AgNRs at a concentration of 300  $\mu\text{M}$ . (A) and (B) are taken from a lateral perspective and (C), (D) and (E) are top view photographs of the final material.

*AuNRs after extracting from gel*

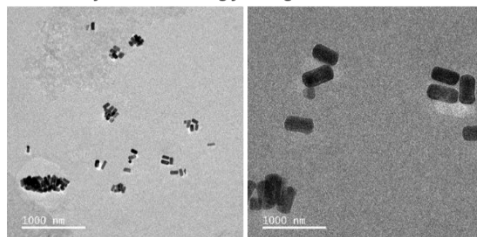

*AuNSs after extracting from gel*

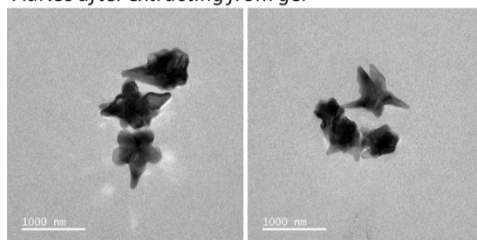

Figure S3. Transmission electron microscopy images of Au@AgNRs and AuNSs recovered after dissolving the gel to test NP morphology after gelation process.

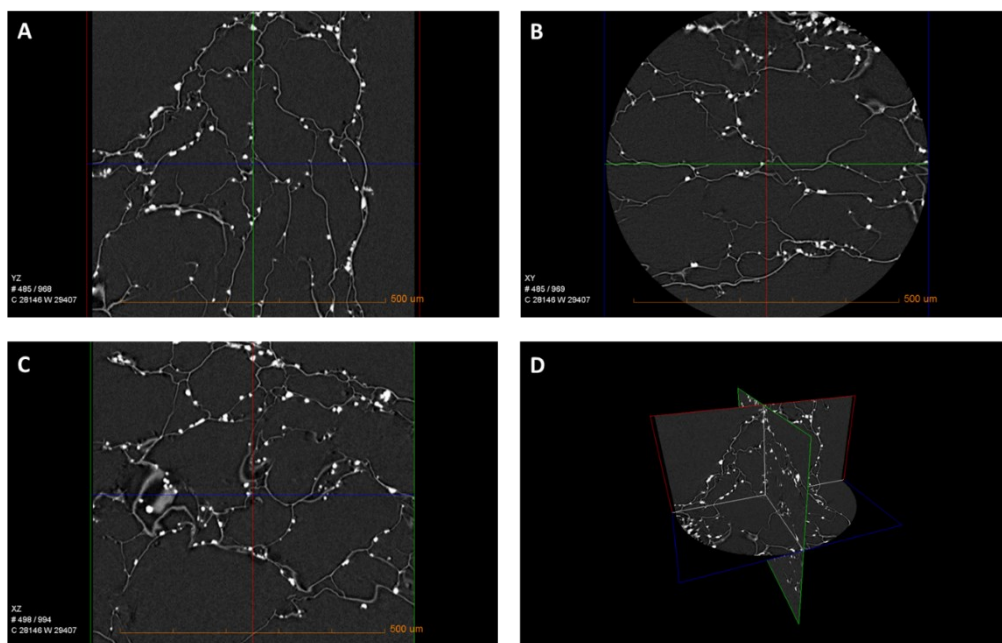

Figure S4- NanoCT analysis of the GG-SLH-NPs: (A, B, C) different cross-sections of the GG-SLH-NPs showing the pores of the hydrogel as well as the NPs inserted within the hydrogel (shiny spots) and (D) virtual reconstruction of the three previous cross-sections.

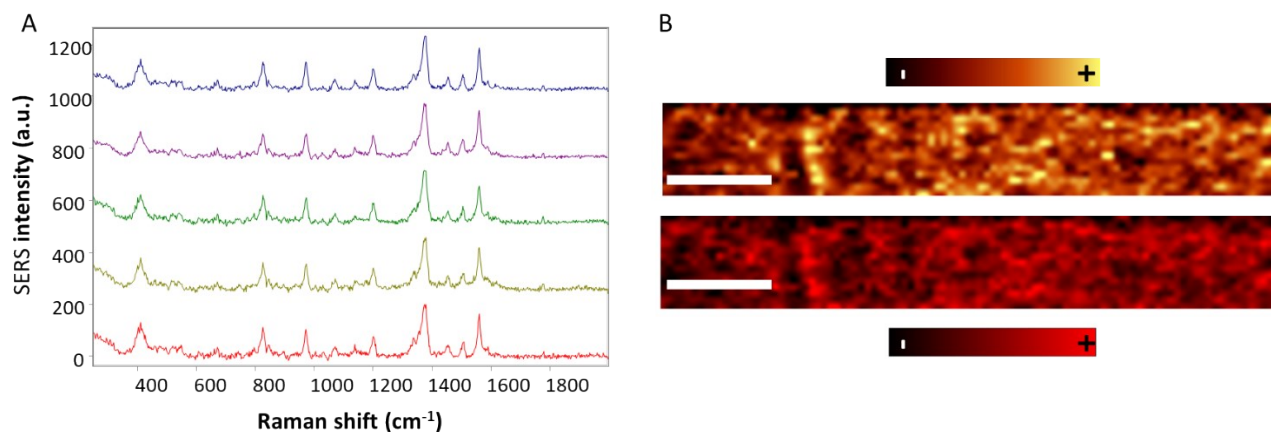

Figure S5. Stability of the GG-SLH-AuNSTs hybrid materials. Samples were measured 6 months after the measurements presented in Figure 4A under the same conditions. (A) Five SERS spectra of 1NAT acquired at five different points of the hybrid material after storage for 6 months; (B) SERS mapping of the 1368 cm<sup>-1</sup> band (orange) and of the 1555 cm<sup>-1</sup> band (red) of the same area of the NP loaded hydrogel.

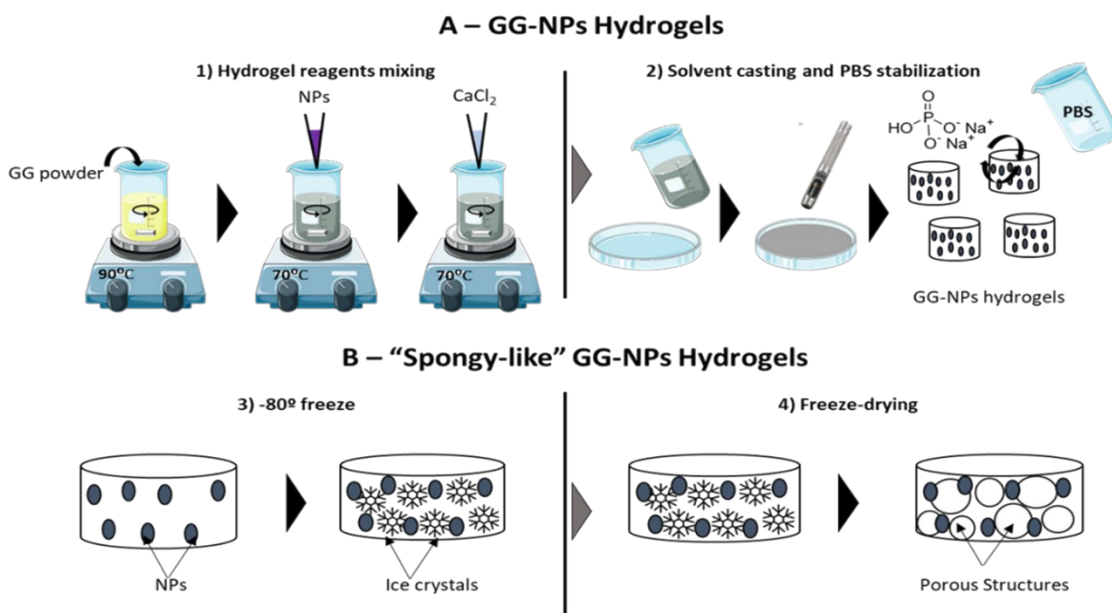

Figure S6. Production of "spongy-like" Gellan Gum with incorporated nanoparticles hydrogels (GG-SLH-NPs).

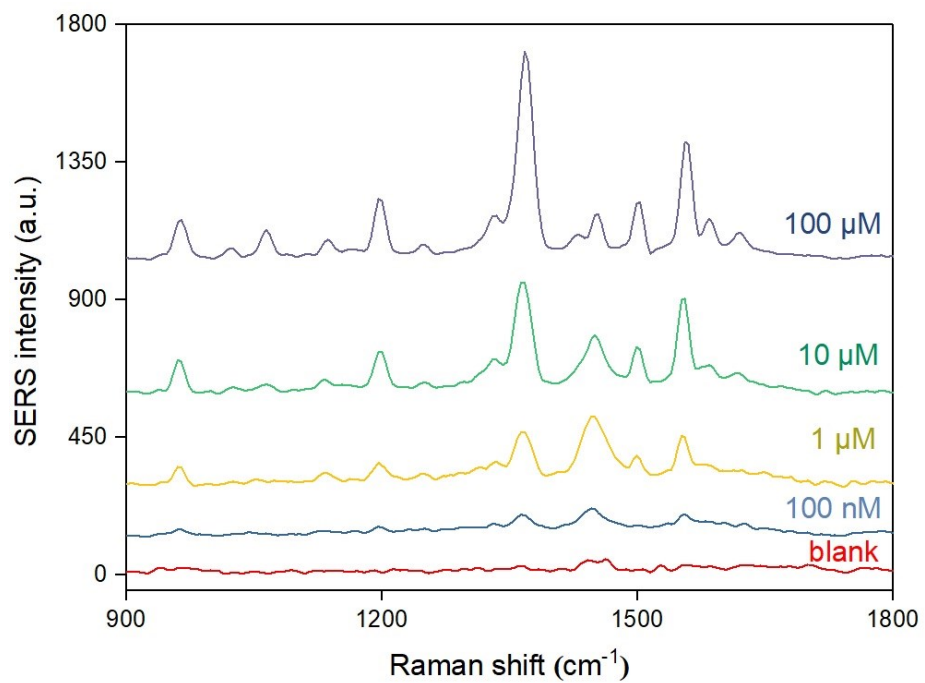

Figure S7. SERS spectra of 1NAT at different concentrations captured from the solution by GG-SLH-Au@Ag NRs.
